# Supplementary material
Source: MDPI journal article supplement (https://www.mdpi.com/1996-1073/14/9/2547)
Supplement: s1 [file s1]

## Supplementary Materials

# Digitally patterned mesoporous carbon nanostructures of colorless polyimide for transparent and flexible micro-supercapacitor

Hyeonwoo Kim<sup>a,†</sup>, Suwon Hwang<sup>a,†</sup>, Taeseung Hwang<sup>a</sup>, Jung-Bin In<sup>b,c</sup> and Junyeob Yeo<sup>a,d,\*</sup>

<sup>a</sup> Novel Applied Nano Optics Lab., Department of Physics, Kyungpook National University, 80 Daehak-ro, Bukgu, Daegu 41566 and Republic of Korea

<sup>b</sup> Soft Energy Systems and Laser Applications Laboratory, School of Mechanical Engineering, Chung-Ang University, Seoul 06974, Republic of Korea

<sup>c</sup> Department of Intelligent Energy and Industry, Chung-Ang University, Seoul 06974, Republic of Korea

<sup>d</sup> Department of Hydrogen and Renewable Energy, Kyungpook National University, 80 Daehak-ro, Bukgu, Daegu 41566, Republic of Korea

<sup>†</sup>These authors contributed equally to this work

\*Correspondence: junyeob@knu.ac.kr

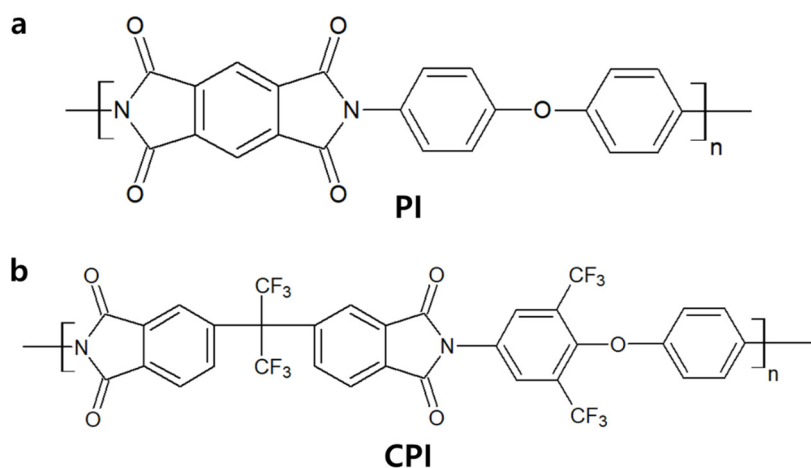

**Figure 1.** Chemical structure of (a) PI and (b) CPI.

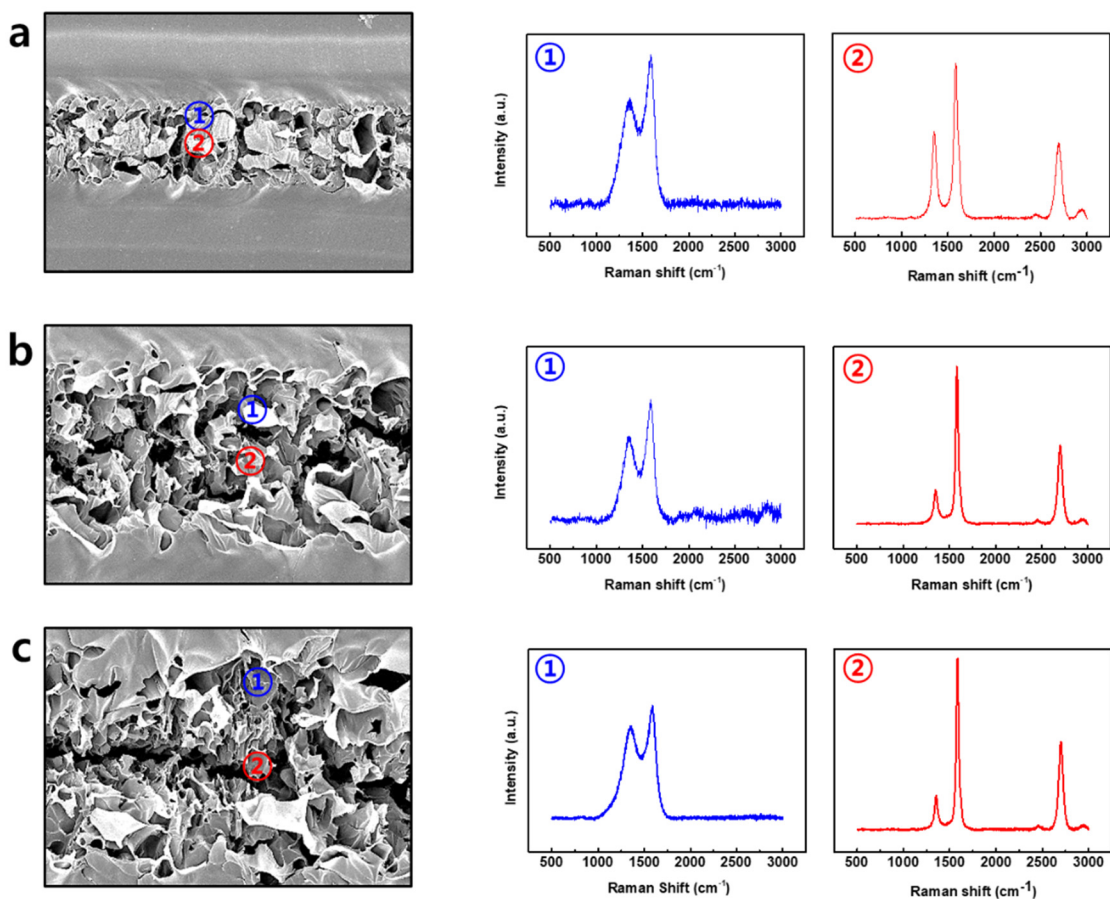

**Figure 2.** Raman spectra of carbon electrode fabricated by laser powers of (a) 50mW, (b) 100mW, and (c) 150mW at different area. Blue and red lines indicate amorphous and crystallized area in carbon electrode, respectively.

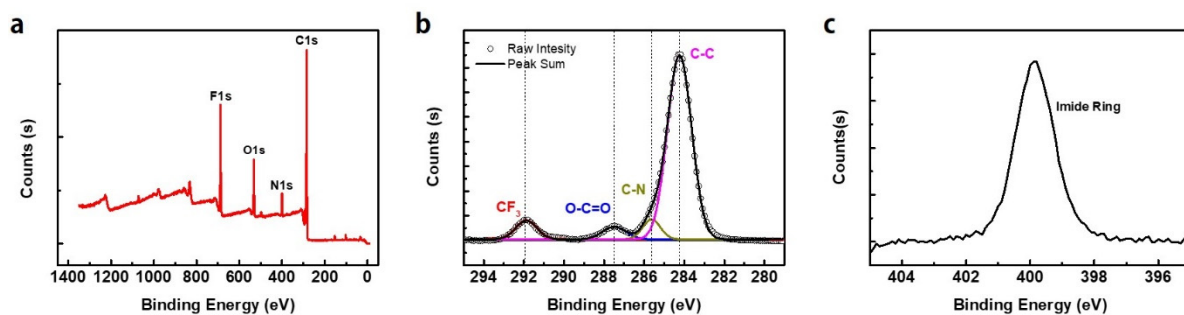

**Figure 3.** (a) The XPS survey spectrum of pristine CPI substrate and core level deconvoluted spectra of (b) C1s and (c) N1s.

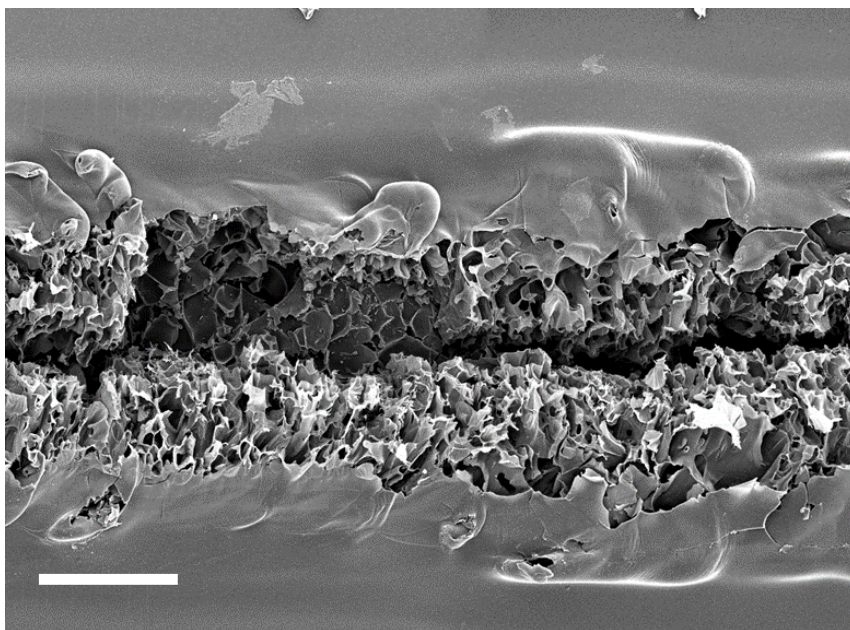

**Figure 4.** The SEM image of carbon electrode produced by DLWC at 200 mW and 1 mm s<sup>-1</sup>. Since the produced carbon electrode is exploded and destroyed during DLWC, specific areal capacitance can be decreased. A scale bar is 20  $\mu$ m.

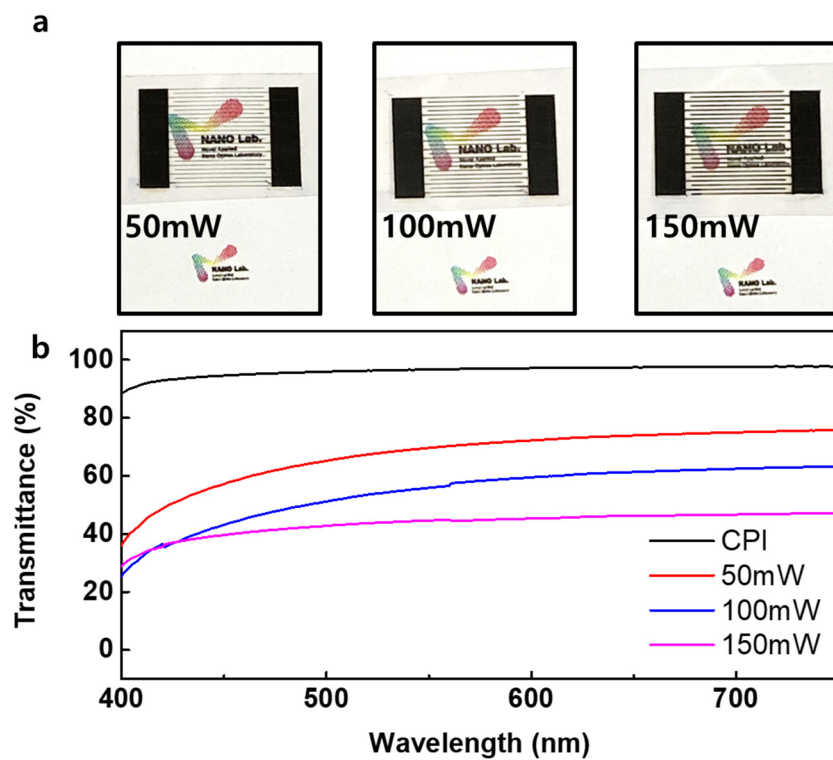

**Figure 5.** (a) Digital images and (b) the transmittances of carbonized CPI based MSC with different laser powers.
